# Supplementary material for: The influence of visitor-based social contextual information on visitors’ museum experience
Source: PubMed Central journal article supplement (PMC9129054; doi:10.1371/journal.pone.0266856), 2022-05-24
Supplement: pone.0266856.s003.pdf [file pone.0266856.s003.pdf]

### S3 Appendix. Explanation of materials for visitor experiment

**Table A. List of Artworks in first exhibition [E1]**

| No. | Title (year)               | Size             | Material                       |
|-----|----------------------------|------------------|--------------------------------|
| 1   | The pulse of nature (1950) | w-68 x h-133 cm  | Ink on Korean paper            |
| 2   | Drunken night (1955)       | w-55 x h-40 cm   | Ink and color on Korean paper  |
| 3   | Composition (1961a)        | w-89 x h-116 cm  | Korean paper collage on canvas |
| 4   | Composition (1962)         | w-70 x h-133 cm  | Oil on canvas                  |
| 5   | Composition (1970)         | w-65 x h-120 cm  | Cotton on Korean paper         |
| 6   | Composition (1972)         | w-132 x h-274 cm | Ink on Korean paper            |
| 7   | People (1986)              | w-266 x h-167 cm | Ink on Korean paper            |
| 8   | People (1988)              | w-98 x h-177 cm  | Ink on Korean paper            |
| 9   | Eastern travel (1980)      | w-18 x h-18 cm   | Ink on Korean paper            |
| 10  | Eastern travel (1980)      | w-17 x h-17.5 cm | Ink on Korean paper            |

*\* All artworks are created by Lee-Ungno*

**Table B. List of Artworks in second exhibition [E2]**

| No. | Title (year)                                    | Size             | Material                       |
|-----|-------------------------------------------------|------------------|--------------------------------|
| 1   | Growth (1950)                                   | w-68 x h-133 cm  | Ink and color on Korean paper  |
| 2   | Heeve, ho! Heeve, ho! (1955)                    | w-44 x h-24.5 cm | Ink and color on Korean paper  |
| 3   | Composition (1961b)                             | w-89 x h-116 cm  | Korean paper collage on canvas |
| 4   | Composition (1963)                              | w-128 x h-66 cm  | Ink and color on Korean paper  |
| 5   | Composition (1972)                              | w-316 x h-269 cm | Ink and color on Korean paper  |
| 6   | 64 characters in the Book of the changes (1974) | w-24 x h-33 cm   | Ink on Korean paper            |

|    |                       |                    |                     |
|----|-----------------------|--------------------|---------------------|
| 7  | People (1988)         | w-70 x h-130 cm    | Ink on Korean paper |
| 8  | People (1987)         | w-40.5 x h-34.5 cm | Ink on Korean paper |
| 9  | Eastern travel (1980) | w-34 x h-34 cm     | Ink on Korean paper |
| 10 | Eastern travel (1980) | w-39 x h-28 cm     | Ink on Korean paper |

\* All artworks are created by Lee-Ungno

### Figure C. Preparations for experiment

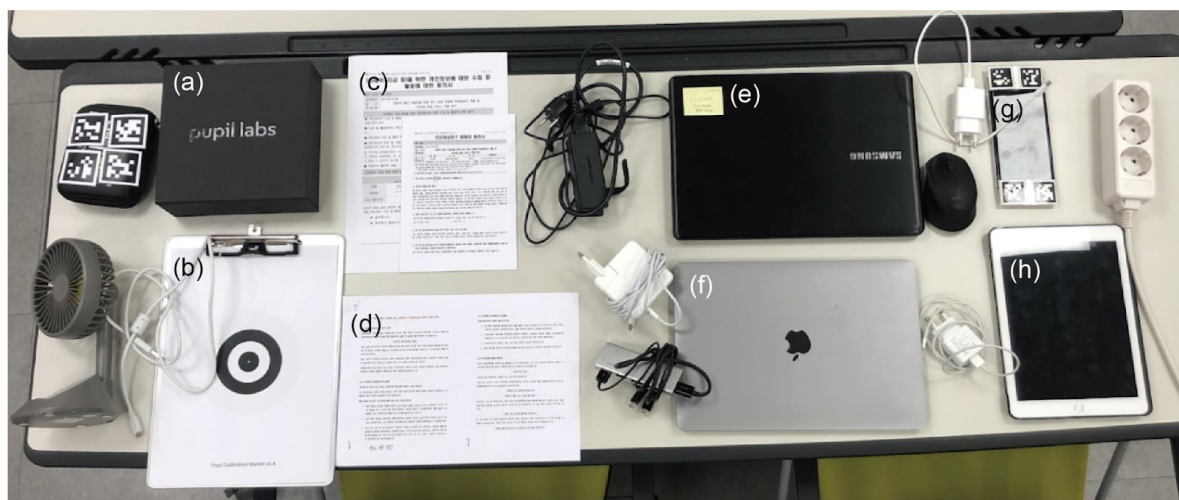

- (a) Mobile eye-tracker (Pupil Labs, Pupil Core 120 Hz binocular)
- (b) Calibration marker v.0.4. (Available from: [https://docs.pupil-labs.com/pdfs/v0.4\\_marker.pdf](https://docs.pupil-labs.com/pdfs/v0.4_marker.pdf))
- (c) Consent form (KAIST IRB)
- (d) Check-list of experiment for researchers
- (e) First laptop computer (Samsung, NT series, OS: Windows 10) using as server of mobile application
- (f) Second laptop computer (Apple, MacBook Pro 2018, OS: Catalina, 10.15) connected with mobile eye-tracker with Pupil Capture v.3.4 for tracking participants' eye-movement. (Available from: <https://docs.pupil-labs.com/core/>)
- (g) Mobile phone (Samsung Galaxy Note 9, OS: Android 10) to display guidance application
- (h) Tablet computer to introduce experiment to participants
